# Supplementary material for: Glutathione peroxidase 2 is a metabolic driver of the tumor immune microenvironment and immune checkpoint inhibitor response
Source: HighWire-hosted journal article supplement (doi:10.1136/jitc-2022-004752), 2022-08-01
Supplement: jitc-2022-004752supp002_data_supplement.pdf [file jitc-2022-004752supp002_data_supplement.pdf]

### Supplementary Methods:

**Cloning and viral infection of cells.** In-Fusion Cloning (TaKaRa, Osaka, Japan) was used to construct a murine full length expression cDNA construct containing the endogenous 3' UTR corresponding to the regulatory selenocysteine insertion element (SECIS), which directs incorporation of selenocysteine (SEC) into the stop codon positioned at amino acid 40 near the N-terminus. Essentially, RNA was extracted from murine esophageal tissue (C57BL/6J) and cDNA generated using the superscript II reverse transcription kit (Thermo Fisher, Waltham, MA). cDNA was used as a template for PCR amplification of the full length GPX2 cDNA plus the SECIS using primers with additional overlapping sequence from the lentiviral destination vector pLVX-IRES-Puro (Addgene, Watertown, MA). The GPX2-SECIS amplicon was cloned into pLVX-IRES-Puro digested with XhoI / BamHI to generate pLVX-IRES-mGFPX2 (Supplementary Figure 1), which lacks fluorescent or exogenous tags, and the sequence confirmed by Sanger Sequencing. For *in vitro* GPX2 knockdown experiments, human cells were infected with lentiviral pGIPZ-shRNA (Horizon, Waltham, MA) targeting human GPX2 (V3LHS\_368762 with antisense TCCAGGCCACATCTGAGCG ) or an empty vector (EV) control.

Lentiviral vectors with insert or devoid of insert (negative controls) were packaged in 293FT by co-transfecting them with helper vectors pMD2.G and psPAX2 (Addgene). Supernatants containing virus were collected and concentrated using Lenti-X Concentrators (Takara Bio, USA) before infecting cells by spinoculation in the presence of polybrene (6-10 µg/ml). To generate stable cell lines, MOC1 infected cells were selected with puromycin (2 µg/ml) initially as polyclonal populations and single cells subsequently seeded into 96 well plates using a BD FACS Arial cell sorter to derive long term clones subsequently screened for GPX2 protein levels by Western blot analysis. For GPX2 KD, human cells infected with shRNA were sorted for EGFP expression 48 h post-infection and allowed to recover for 2 days before setting up experiments to collect supernatants for ELISA or cell lysates for Western blot analyses. Levels of prostaglandin E2 (PGE2) or interleukin-6 (IL-6) in conditioned media were measured by human or mouse ELISA kits (Cayman chemicals, Ann Arbor, MI) and normalized to total cell number.

**Immune Profiling by flow cytometry.** All *in vivo* experiments were performed with approval of the Institutional Animal Care and Use Committee (IACUC) at Baylor College of Medicine (BCM) or MD Anderson and followed established protocols. Female C57BL/6J mice (8–10 weeks of age) were purchased from the Jackson Laboratory and housed under specific pathogen-free conditions. Mice were randomly divided into treatment groups and subcutaneously (s.c.) inoculated with  $3 \times 10^6$  MOC1/wt, MOC1/pLVX-IRES-puro, or  $2.5 \times 10^6$  MOC1/pLVX-IRES-puro-GPX2 cells in the right flank. Tumor area (mm<sup>2</sup>) was calculated as  $L \times W$ , where L is Length and W is Width. To profile tumor immune cell infiltration, MOC1/wt, MOC1/pLVX-IRES-puro, and MOC1/pLVX-IRES-puro-GPX2 tumors were harvested at equal sizes (~0.8 cm width), and analyzed by flow cytometry using the approach we previously described<sup>1,2</sup> with a slight modification. Briefly, tumors were dissociated in RPMI 1640 (Sigma-Aldrich) containing DNase I (20 U/ml; Sigma-Aldrich), Collagenase I (1mg/ml; EMD Millipore) and Collagenase IV (250 U/ml; Worthington Biochemical Corporation) using a gentleMACS Dissociator (Miltenyi Biotec, CA) and then incubated at 37°C for 30 minutes to complete digestion. Tumor infiltrating leukocytes were enriched from single cell suspensions using Lymphoprep™ (STEMCELL Technologies). Cells were first blocked with anti-mouse CD16/CD32 Fc block (BD Biosciences) and stained using fluorescently tagged antibodies from either the lymphocyte or myeloid panels (Supplementary Methods). DAPI was added to stained leukocytes to exclude dead cells and subsets analyzed with the gating strategy outlined in Supplementary Figure 2. For intracellular staining, cells were fixed and permeabilized with Intracellular Fixation and Permeabilization

Buffer Set (eBioscience) prior to the addition of anti-INOS. Data were acquired on a LSRII and LSRFortessa (BD Biosciences) flow cytometers, for myeloid and T cell panels respectively, and analyzed using FlowJo v10 software (FlowJo, LLC).

**Generation of Nrf2 and NF-κB activation gene signatures.** We previously described a method for vetting published gene signature lists to identify the most robust targets specific for a given tissue.<sup>3</sup> Essentially, the two by two Pearson correlation values for co-expression among all possible gene pairs are calculated using a cohort of samples with similar histology or the cohort under study and the matrix of cross-correlations is analyzed by two-way hierarchical clustering to produce a heatmap with co-expression modules appearing along the diagonal. Modules are then further evaluated for greatest average cross-correlations or biological significance that matches known functional properties of the pathway being defined to identify the most robust gene list. To derive Nrf2 and NF-κB signatures, we downloaded published lists of 469 genes (NFE2L2.V2) and 84 genes (HINATA NFκB Targets Keratinocytes Up) from the Molecular Signature Database.<sup>4</sup> Cross-correlation of the 469 Nrf2 gene list was examined in pooled TCGA samples (i.e., Supplementary Figure S7) and the 84 NF-κB gene list in a panel of 65 established human HNSCC cell lines (Supplementary Methods Figure SM1) to identify the most robust downstream targets.

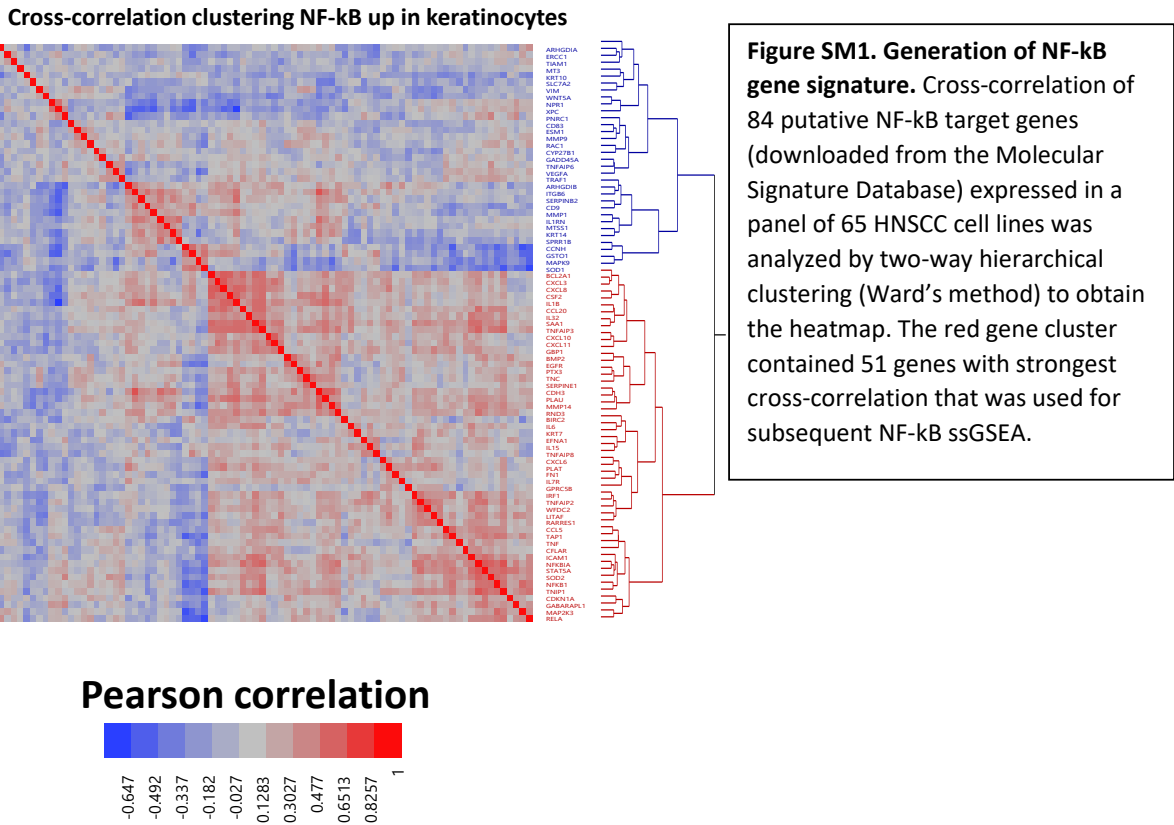

**Consensus Clustering**-We used a modification of the resampling-based method published by Monti et al.<sup>5</sup> to perform hierarchical two-way agglomerative (Ward’s linkage) consensus clustering with an in-house Matlab script listed below and publicly available at <https://github.com/aif33/Hierarchical-two-way-agglomerative-consensus-clustering>

To run the program, 5 Matlab files below (names in bold) are created and saved to the same folder containing input data files. Users run the ClusteringScript.m file and input 3 parameters as “File name.xlsx”, “maximum number of clusters to try (i.e., 8)”, and “FirstDimension , Second Dimension or an empty string (””) referring to orientation of Z-scores to be calculated. If input values are already Z transformed, then input the empty string. The program always clusters whichever variable is listed vertically by whatever feature is listed horizontally. For example, to cluster samples based on subset scores or gene expression values the input file matrix would have each row representing a different sample and each column a different feature. If data are not Z-scaled the user would input “FirstDimension “ to calculate Z vertically. To reverse and cluster genes or leukocyte subsets by samples, simply transpose the input matrix and input “SecondDimension” so Z -scores will now be calculated horizontally to give equivalent values. The expected architecture for input files is shown by example below. The additional Matlab files contain helper methods and classes to run Clusterinscript.m. The program is hard coded to use 400 re-samplings but that can be changed within the code according to user preference. The program uses an 80% proportion for random re-sampling and applies the identical set of 400 re-samplings across all “N” clusters to facilitate choice of optimal N, which can be chosen from the output graphical plot of Normalized Euclidian Distance (NED) verses number of clusters by selecting a local minimum. The NED is a measure of error that represent the Euclidean distance between a perfect transformed similarity matrix and the calculated transformed similarity matrix at each value of N as we previously described.<sup>3</sup> Thus optimal choice of clusters proceeds independently for the first and second dimension analyses when performing two-way clustering.

FirstDimension input-Z scores calculated vertically

| samples      | aDC      | Bcells   | CD8      | Cytotoxic DC | iDC      |          |
|--------------|----------|----------|----------|--------------|----------|----------|
| TCGA-4P-AA8J | 3962.401 | 3861.641 | 1518.665 | 1517.294     | -2148.8  | 2101.675 |
| TCGA-BA-4074 | 3569.409 | -1372.16 | -3636.74 | -2287.41     | -1142.81 | -1614.04 |
| TCGA-BA-4075 | -178.691 | -2850.88 | -4107.13 | -2803.09     | 807.9017 | 1071.645 |
| TCGA-BA-5149 | 6265.759 | 1085.697 | -963.355 | -910.477     | -2614.58 | -936.648 |
| TCGA-BA-5151 | 6960.077 | 2522.59  | -2192.68 | -1244.51     | 486.7138 | 291.1622 |
| TCGA-BA-5152 | 8171.622 | 3530.965 | 1547.833 | 4269.614     | 2501.658 | 3267.812 |
| TCGA-BA-5556 | 8832.716 | 4422.375 | 4229.137 | 5707.508     | -432.351 | 2391.95  |
| TCGA-BA-5557 | 4666.945 | -887.898 | 588.2251 | 755.4258     | 2897.251 | 2814.198 |
| TCGA-BA-5558 | 6710.69  | 1855.682 | 1482.251 | 2441.415     | -1206.88 | 537.9367 |

SeondDimension input- Z scores calculated horizontally

| <b>samples</b>   | TCGA-4P-AA8J | TCGA-BA-4074 | TCGA-BA-4075 | TCGA-BA-5149 | TCGA-BA-5151 | TCGA-BA-5152 | TCGA-BA-5556 | TCGA-BA-5557 | TCGA-BA-5558 |
|------------------|--------------|--------------|--------------|--------------|--------------|--------------|--------------|--------------|--------------|
| <b>aDC</b>       | 3962.401     | 3569.409     | -178.691     | 6265.759     | 6960.077     | 8171.622     | 8832.716     | 4666.945     | 6710.690     |
| <b>Bcells</b>    | 3861.641     | -1372.162    | -2850.881    | 1085.697     | 2522.590     | 3530.965     | 4422.375     | -887.898     | 1855.682     |
| <b>CD8</b>       | 1518.665     | -3636.743    | -4107.126    | -963.355     | -2192.683    | 1547.833     | 4229.137     | 588.225      | 1482.251     |
| <b>Cytotoxic</b> | 1517.294     | -2287.413    | -2803.089    | -910.477     | -1244.508    | 4269.614     | 5707.508     | 755.426      | 2441.415     |
| <b>DC</b>        | -2148.800    | -1142.811    | 807.902      | -2614.576    | 486.714      | 2501.658     | -432.351     | 2897.251     | -1206.876    |
| <b>iDC</b>       | 2101.675     | -1614.045    | 1071.645     | -936.648     | 291.162      | 3267.812     | 2391.950     | 2814.198     | 537.937      |

1. ClusteringScript.m

```

clust = clusterSampling("NewBLCAsamples.xlsx", 8, "FirstDimension");
%possible inputs -> "FirstDimension", "SecondDimension", ""
maxGroups = size(clust,2);

x = zeros(1,maxGroups);
y = zeros(1,maxGroups);

for i = 1:maxGroups
    x(1,i) = i;
    y(1,i) = clust(i).EuclideanDistance;
end

plot(x,y);

```

## 2. clusterSampling.m

```

function clustSampling = clusterSampling(dataFileName, numberOfGroups,
zScoreDimensionType)

%{

inputs and outputs:

dataFileName --> file name to find the data with sample names in the
left most
column, features we are measuring in the top most row, and values in
the intersections

    feature1  feature2  feature3... featureN
sample1      a         b         c         d
sample2      e         f         g         h
.            .         .         .         .
.            .         .         .         .
.            .         .         .         .
sampleN      i         j         k         l

numberOfGroups -> number of groups to be used in clustering

clustSampling will be a list of a class 'ClusterInfo',
where each instance of 'ClusterInfo' contained in the list represents
instance number N, for 1 <= N <= numberOfGroups.

an instance n of 'ClusterInfo' contains:
(a) percent similarity matrix,
(b) transformed and sorted percent similarity matrix
(c) euclidean distance between matrix of ones and (b)

%}

clustSampling = clusterN.empty;

```

```
[NUM,TXT,RAW] = xlsread(dataFileName);

%eliminate first column and first row labels. then we are going to
randomly
%sample 80 percent of the data and calcuate z scores of this randomly
%selected 80 percent.

numberOfSamples = size(NUM,1);

numOfResamplings = 400;

allRks = zeros(numOfResamplings, numberOfSamples);

% generate indexes of which samples we selected randomly with
% 80 % of samples selected
% r(k) == 0 ? picked sample k : did not pick sample k
% where k is the index of the sample in the vector of sample names from
% our data file
% get 400 pages of z scores --> see numOfResamplings

numberOfRandomRows = round(numberOfSamples * .8);

zScoresSampledPages = zeros(numberOfRandomRows, size(NUM,2),
numOfResamplings);

for cnt = 1:numOfResamplings

    k = randperm(numberOfSamples, numberOfRandomRows);
    r = true(1,numberOfSamples);
    r(k) = false;

    allRks(cnt,:) = r;

    numSampled = double.empty;

    for i = 1:numberOfSamples
        if r(i) == 0 %if r is 0, we picked that sample
            numSampled(end+1,:) = NUM(i,:);
        end
    end

    if zScoreDimensionType == "FirstDimension"

        zScoresSampled = zscore(numSampled,0,1);
        %z score of randomly sampled data in first dimension

        zScoresSampledPages(:,cnt) = zScoresSampled(:,:);

    elseif zScoreDimensionType == "SecondDimension"

        zScoresSampled = zscore(numSampled,0,2);
        %z score of randomly sampled data in second dimension

        zScoresSampledPages(:,cnt) = zScoresSampled(:,:);
    else
```

```
        zScoresSampled = numSampled; %input is already z scored

        zScoresSampledPages(:, :, cnt) = zScoresSampled(:, :);
    end

end

for N = 1:numberOfGroups

    numeratorMatrix = zeros(numberOfSamples, numberOfSamples);

    denominatorMatrix = zeros(numberOfSamples, numberOfSamples);

    for cnt = 1:numOfResamplings

        r = allRks(cnt, :);

        zScoresSampled = zScoresSampledPages(:, :, cnt);

        clusterMatrixOfSampled = clusterMatrix(zScoresSampled, N);

        %we are going to take the randomly sampled groups and create a
        %one column
        %matrix with the rest of the groups we did not sample and assign
        "fake"
        %group numbers to the groups that we did not sample

        fakeGroupNumber = 10000;

        indexOfSampled = 1;

        clusterMatrixAll = zeros(i, 1);

        clusterMatrixAllForDenominator = zeros(i, 1);

        for k = 1:numberOfSamples

            if r(k) == 0
                clusterMatrixAll(k) =
clusterMatrixOfSampled(indexOfSampled);
                clusterMatrixAllForDenominator(k) = 1;
                indexOfSampled = indexOfSampled + 1;
            else
                clusterMatrixAll(k) = fakeGroupNumber;
                clusterMatrixAllForDenominator(k) = fakeGroupNumber;
                fakeGroupNumber = fakeGroupNumber + 1;
            end

        end

        end

        similarityMatrixNumerator = similarityMatrix(clusterMatrixAll);

        similarityMatrixDenominator =
similarityMatrix(clusterMatrixAllForDenominator);

        numeratorMatrix = numeratorMatrix + similarityMatrixNumerator;
```

```
        denominatorMatrix = denominatorMatrix +
similarityMatrixDenominator;

    end

    sampleNames = TXT(2:end,1);

    percentSimilarityMatrix = numeratorMatrix./denominatorMatrix;

    clusterSimilarity = clusterMatrix(percentSimilarityMatrix,N);

    %now we will compute transformed percent similarity matrix

    sampleIndexAndGroups = zeros(numberOfSamples,2);

    sampleIndexAndGroups(:,1) = 1:numberOfSamples;

    sampleIndexAndGroups(:,2) = clusterSimilarity;

    sampleIndexSortedByGroups = sortrows(sampleIndexAndGroups,2);

    mappedSampleIntersection =
containers.Map('KeyType','char','ValueType','double');

    percentSimilaritySortedAndT = cell(numberOfSamples +1,numberOfSamples
+1);

    for a = 1:numberOfSamples
        %a is our row index

        groupNumberRow = clusterSimilarity(a);

        rowName = string(sampleNames(a));

        percentSimilaritySortedAndT(a+1,1) =
sampleNames(sampleIndexSortedByGroups(a,1));

        for b = 1:numberOfSamples
            %b is our column index

            colName = string(sampleNames(b));

            groupNumberCol = clusterSimilarity(b);

            if (groupNumberRow == groupNumberCol)
                value = percentSimilarityMatrix(a,b);
            else
                value = 1 - percentSimilarityMatrix(a,b);
            end

            mappedSampleIntersection(rowName + '_' + colName) = value;

            percentSimilaritySortedAndT(1,b+1) =
sampleNames(sampleIndexSortedByGroups(b,1));

        end
    end
```

```
end

for a = 1:numberOfSamples

    rowName = string(percentSimilaritySortedAndT(a+1,1));

    for b = 1:numberOfSamples

        colName = string(percentSimilaritySortedAndT(1,b+1));

        percentSimilaritySortedAndT(a+1,b+1) =
num2cell(mappedSampleIntersection(rowName + '_' + colName));

    end

end

percentSimilarityValuesSortedAndT =
cell2mat(percentSimilaritySortedAndT(2:numberOfSamples + 1, 2:numberOfSamples
+ 1));

%now we will compute the euclidean distance

matrixOfOnes = ones(numberOfSamples);

x = matrixOfOnes - percentSimilarityValuesSortedAndT;

y = x.^2;

sumFinal = sum(y,'All');

finalValue = (sqrt(sumFinal) / numberOfSamples) * 100;

clustSampling(N) = clusterN(percentSimilarityMatrix,
percentSimilaritySortedAndT, finalValue);

end

end
```

### 3. clusterN.m

```
classdef clusterN
    properties
        PercentSimilarityMatrix
        PercentSimilarityMatrixSortedAndT
        EuclideanDistance
    end

    methods
        function obj =
clusterN(percentSimilarity,percentSimilaritySortedAndT, euclideanDistance)
            obj.PercentSimilarityMatrix = percentSimilarity;
            obj.PercentSimilarityMatrixSortedAndT =
percentSimilaritySortedAndT;
```



```
        obj.EuclideanDistance = euclideanDistance;
    end
end
end
```

4. similarityMatrix.m

```
function D = similarityMatrix(clusterMatrixAll)

N = size(clusterMatrixAll,1);
D = zeros(N,N);
for i=1:N
    for j=1:i
        if (clusterMatrixAll(i) == clusterMatrixAll(j))
            D(i,j) = 1;
        else
            D(i,j) = 0;
        end
        D(j,i) = D(i,j);% D is the similarity matrix
    end
end
```

5. clusterMatrix.m

```
function clustMatrix = clusterMatrix(inputMatrix, numberOfGroups)

%get cluster matrix from N groups, defined by numberOfGroups

linkageMatrix = linkage(inputMatrix, 'ward');
clustMatrix = cluster(linkageMatrix,'MaxClust',numberOfGroups);
end
```

**Immune Profiling-** Single cell suspensions prepared as described in the main methods were divided into two tubes and stained with fluorescently tagged antibodies to either a lymphocyte or myeloid panel.

| Panel    | Antibody                   | Source        | Catalogue # | Fluorophore  | CD4+ T cells | CD8+ T cells | NK cells | B cells | G-MDSC | Monocytes | MΦ | M1 MΦ | M2 MΦ | Dendritic cells |
|----------|----------------------------|---------------|-------------|--------------|--------------|--------------|----------|---------|--------|-----------|----|-------|-------|-----------------|
| Lymphoid | Anti-mouse CD45 (30-F11)   | ThermoFisher  | 47-0451-82  | APC-EF780    | +            | +            | +        | +       |        |           |    |       |       |                 |
| Lymphoid | Anti-mouse TCRB (H57-597)  | ThermoFisher  | 15-5961-82  | APC          | +            | +            | +        |         |        |           |    |       |       |                 |
| Lymphoid | Anti-mouse CD4 (GK1.5)     | ThermoFisher  | 15-0041-82  | PE-CYN5      |              | +            | +        |         |        |           |    |       |       |                 |
| Lymphoid | Anti-mouse CD8A (KT15)     | Santa Cruz    | SC-53473    | PE           |              |              | +        |         |        |           |    |       |       |                 |
| Lymphoid | Anti-mouse FOXP3 (FJK-16S) | ThermoFisher  | 56-5698-82  | FITC         |              |              | +        |         |        |           |    |       |       |                 |
| Lymphoid | Anti-NK1.1 (PK136)         | ThermoFisher  | 45-5941-82  | PerCP-CYN5.5 |              |              |          | +       |        |           |    |       |       |                 |
| Lymphoid | Anti-CD19                  | ThermoFisher  | 48-0193-82  | EF450        |              |              |          | +       |        |           |    |       |       |                 |
| Meyloid  | Anti-mouse CD45 (30-F11)   | ThermoFisher  | 47-0451-82  | APC-EF780    |              |              |          |         | +      | +         | +  | +     | +     | +               |
| Meyloid  | Anti-mouse CD11b (M1/70)   | BD Pharmingen | 561960      | APC          |              |              |          |         | +      | +         | +  | +     | +     |                 |
| Meyloid  | Anti-mouse LY-6G (RB6-8C5) | ThermoFisher  | 12-5931-82  | PE           |              |              |          |         | +      |           |    |       |       |                 |
| Meyloid  | Anti-mouse LY6C (HK1.4)    | ThermoFisher  | 45-5932-82  | PerCP-CYN5.5 |              |              |          |         |        | +         |    |       |       |                 |
| Meyloid  | Anti-mouse MHCII (IA/1E)   | ThermoFisher  | 56-5321-82  | AF700        |              |              |          |         | +      |           | +  | +     | +/-   | +               |
| Meyloid  | Anti-mouse F4/80 (BM8)     | ThermoFisher  | 48-4801-82  | EF450        |              |              |          |         |        |           | +  | +     | +     |                 |
| Meyloid  | Anti-mouse CD11C (N418)    | ThermoFisher  | 15-0114-82  | PE-CYN5      |              |              |          |         |        |           |    |       |       | +               |
| Meyloid  | Anti-iNOS/NOS              | BD Pharmingen | 610330      | FITC         |              |              |          |         |        |           |    | +     |       |                 |

The table above lists the antibodies to markers used in the immune panels along with which leukocyte

subsets they identify. Both panels included anti-CD45 (pan leukocyte) antibody and DAPI stain to exclude dead cells from analysis.

### Supplementary References

1. Veeramachaneni R, Yu W, Newton JM, et al. Metformin generates profound alterations in systemic and tumor immunity with associated antitumor effects. *J Immunother Cancer* 2021;9(7) doi: 10.1136/jitc-2021-002773 [published Online First: 2021/07/08]
2. Newton JM, Hanoteau A, Sikora AG. Enrichment and Characterization of the Tumor Immune and Non-immune Microenvironments in Established Subcutaneous Murine Tumors. *J Vis Exp* 2018(136) doi: 10.3791/57685
3. Frederick M, Skinner HD, Kazi SA, et al. High expression of oxidative phosphorylation genes predicts improved survival in squamous cell carcinomas of the head and neck and lung. *Sci Rep* 2020;10(1):6380. doi: 10.1038/s41598-020-63448-z
4. Liberzon A, Birger C, Thorvaldsdóttir H, et al. The Molecular Signatures Database (MSigDB) hallmark gene set collection. *Cell Syst* 2015;1(6):417-25. doi: 10.1016/j.cels.2015.12.004
5. Monti S, Tamayo P, Mesirov J, et al. Consensus Clustering: A Resampling-Based Method for Class Discovery and Visualization of Gene Expression Microarray Data. *Machine Learning* 2003;52(1):91-118. doi: 10.1023/A:1023949509487
